# Supplementary material for: Fear of Falling Does Not Influence Dual-Task Gait Costs in People with Parkinson’s Disease: A Cross-Sectional Study
Source: MDPI journal article supplement (doi:10.3390/s22052029), 2022-03-05
Supplement: s1 [file s1]

# Supplement

## Fear of Falling Does Not Influence Dual-Task Gait Costs in People with Parkinson's Disease: A Cross-Sectional Study

Tino Prell <sup>1,\*</sup>, Manuela Uhlig <sup>2</sup>, Steffen Derlien <sup>3</sup>, Walter Maetzler <sup>4</sup> and Hannah M. Zipprich <sup>2</sup>

<sup>1</sup> Department of Geriatrics, Halle University Hospital, 06120 Halle, Germany

<sup>2</sup> Department of Neurology, Jena University Hospital, 07743 Jena, Germany; manuela.uhlig@uni-jena.de (M.U.); hannah.zipprich@med.uni-jena.de (H.M.Z.)

<sup>3</sup> Institute for Physiotherapy, Jena University Hospital, 07743 Jena, Germany; steffen.derlien@med.uni-jena.de

<sup>4</sup> Department of Neurology, Kiel University, 24105 Kiel, Germany; w.maetzler@neurologie.uni-kiel.de

\* Correspondence: Tino.prell@uk-halle.de

**Table S1.** Cross table for different degrees of fear of falling according to the Falls Efficacy Scale International (FES-I).

|                                             | Low Concerns<br>(N = 6) | Moderate Concerns<br>(N = 11) | High Concerns<br>(N = 23) | Test Statistics               |
|---------------------------------------------|-------------------------|-------------------------------|---------------------------|-------------------------------|
| Age (years)                                 | 53.8 60.0 75.1          | 67.3 76.0 80.5                | 64.3 71.0 78.0            | $F_{1,38} = 1.17, P = 0.29$   |
| Disease duration (years)                    | 0.9 8.0 14.2            | 3.3 8.0 12.5                  | 5.2 10.0 13.8             | $F_{1,38} = 1.03, P = 0.32$   |
| MDS-UPDRS III (0–132)                       | 17.8 24.5 41.2          | 15.7 24.0 29.5                | 21.2 28.0 40.0            | $F_{1,38} = 1.35, P = 0.25$   |
| Montreal Cognitive Assessment (MoCa) (0–30) | 18.8 25.5 27.1          | 19.3 22.0 24.7                | 19.0 22.0 25.7            | $F_{1,38} = 0.93, P = 0.34$   |
| Beck's depression inventory II (BDI) (0–63) | 7.8 11.0 14.2           | 5.5 9.0 15.0                  | 10.0 13.0 16.7            | $F_{1,38} = 2.05, P = 0.16$   |
| Timed-up-go-test (s)                        | 5.9 8.9 9.1             | 8.8 12.7 15.5                 | 10.4 16.7 27.6            | $F_{1,37} = 10.20, P < 0.01$  |
| Falls Efficacy Scale International (16–64)  | 17.8 19.0 19.0          | 22.0 23.0 25.0                | 31.3 39.0 41.8            | $F_{1,38} = 141.48, P < 0.01$ |
| Gender: male                                | 0.7 4/6                 | 0.6 7/11                      | 0.5 12/23                 | $\chi = 0.64, P = 0.73$       |
| FOG: FOG                                    | 0.0 0/6                 | 0.2 2/11                      | 0.5 11/23                 | $\chi = 6.38, P = 0.04$       |
| Walking aids: yes                           | 0.0 0/6                 | 0.2 2/11                      | 0.4 9/23                  | $\chi = 4.32, P = 0.12$       |
| Falls: Yes                                  | 0.3 2/6                 | 0.5 5/11                      | 0.6 14/23                 | $\chi = 1.75, P = 0.42$       |
| Hoehn & Yahr stage                          |                         |                               |                           | $\chi = 10.37, P = 0.11$      |
| 1                                           | 0.5 3/6                 | 0.2 2/11                      | 0.0 1/23                  |                               |
| 2                                           | 0.2 1/6                 | 0.2 2/11                      | 0.1 3/23                  |                               |
| 3                                           | 0.3 2/6                 | 0.5 6/11                      | 0.5 12/23                 |                               |
| 4                                           | 0.0 0/6                 | 0.1 1/11                      | 0.3 7/23                  |                               |

**Table S2.** Cross table for different cognitive states according to the Montreal cognitive assessments (MoCA).

|                                             | Normal         | MCI            | PDD            | Test Statistic                |
|---------------------------------------------|----------------|----------------|----------------|-------------------------------|
|                                             | (N = 11)       | (N = 12)       | (N=17)         |                               |
| Age (years)                                 | 60.0 64.0 73.3 | 69.4 72.5 78.6 | 65.3 76.0 78.0 | $F_{1,38} = 2.49, P = 0.12$   |
| Disease duration (years)                    | 3.0 8.0 12.7   | 5.4 9.0 13.6   | 5.0 10.0 14.0  | $F_{1,38} = 0.41, P = 0.53$   |
| MDS-UPDRS III (0–132)                       | 20.0 22.0 25.7 | 15.4 26.5 40.2 | 22.3 29.0 43.3 | $F_{1,38} = 3.55, P = 0.07$   |
| Montreal Cognitive Assessment (MoCa) (0–30) | 26.0 27.0 27.8 | 22.0 23.0 23.6 | 18.0 19.0 19.3 | $F_{1,38} = 292.53, P < 0.01$ |
| Beck's depression inventory II (BDI) (0–63) | 8.0 11.0 14.0  | 6.2 9.5 13.6   | 9.7 13.0 16.3  | $F_{1,38} = 1.40, P = 0.24$   |
| Timed-up-go-test (s)                        | 6.5 9.7 18.4   | 8.8 13.4 18.0  | 9.7 13.5 23.2  | $F_{1,37} = 1.88, P = 0.18$   |
| Falls Efficacy Scale International (16–64)  | 19.5 29.0 37.0 | 24.4 27.5 43.1 | 21.7 33.0 40.3 | $F_{1,38} = 0.59, P = 0.45$   |
| Gender: male                                | 0.4 4/11       | 0.6 7/12       | 0.7 12/17      | $\chi = 3.21, P = 0.20$       |
| FOG: FOG                                    | 0.3 3/11       | 0.5 6/12       | 0.2 4/17       | $\chi = 2.44, P = 0.30$       |
| Walking aids: yes                           | 0.1 1/11       | 0.3 4/12       | 0.4 6/17       | $\chi = 2.59, P = 0.27$       |
| Falls: Yes                                  | 0.5 6/11       | 0.6 7/12       | 0.5 8/17       | $\chi = 0.38, P = 0.83$       |
| Hoehn & Yahr stage                          |                |                |                | $\chi = 12.30, P = 0.06$      |
| 1                                           | 0.5 5/11       | 0.0 0/12       | 0.1 1/17       |                               |
| 2                                           | 0.1 1/11       | 0.2 3/12       | 0.1 2/17       |                               |
| 3                                           | 0.4 4/11       | 0.5 6/12       | 0.6 10/17      |                               |
| 4                                           | 0.1 1/11       | 0.2 3/12       | 0.2 4/17       |                               |

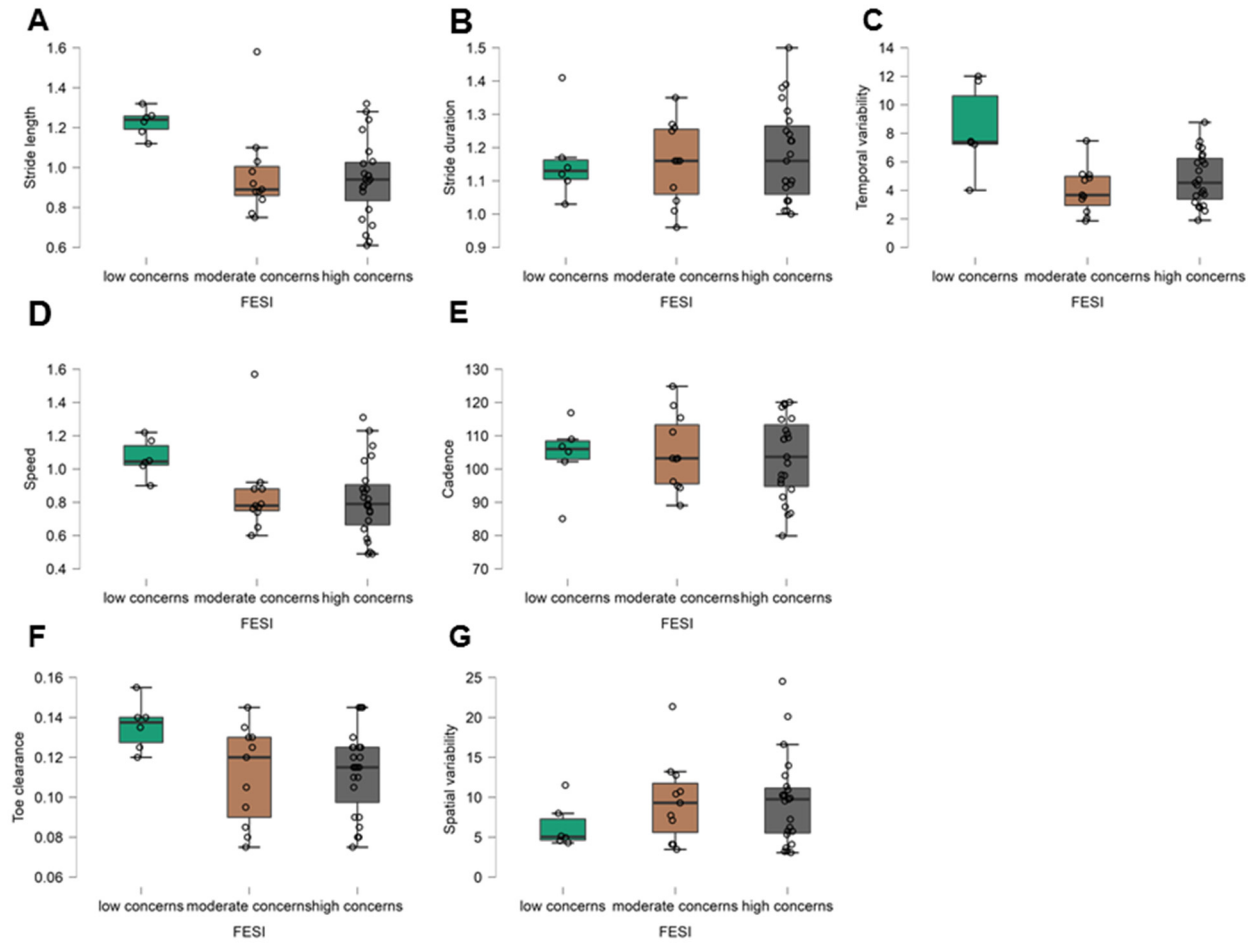

**Figure S1.** Boxplots for group comparisons. Between group differences among people with low, moderate and high fear of falling according to the Falls Efficacy Scale International (FES-I) displayed for **A)** stride length ( $p = 0.009$ ), **B)** stride duration, **C)** temporal variability ( $p = 0.001$ ), **D)** speed ( $p = 0.028$ ), **E)** cadence, **F)** toe clearance ( $p = 0.05$ ), and **G)** spatial variability. .

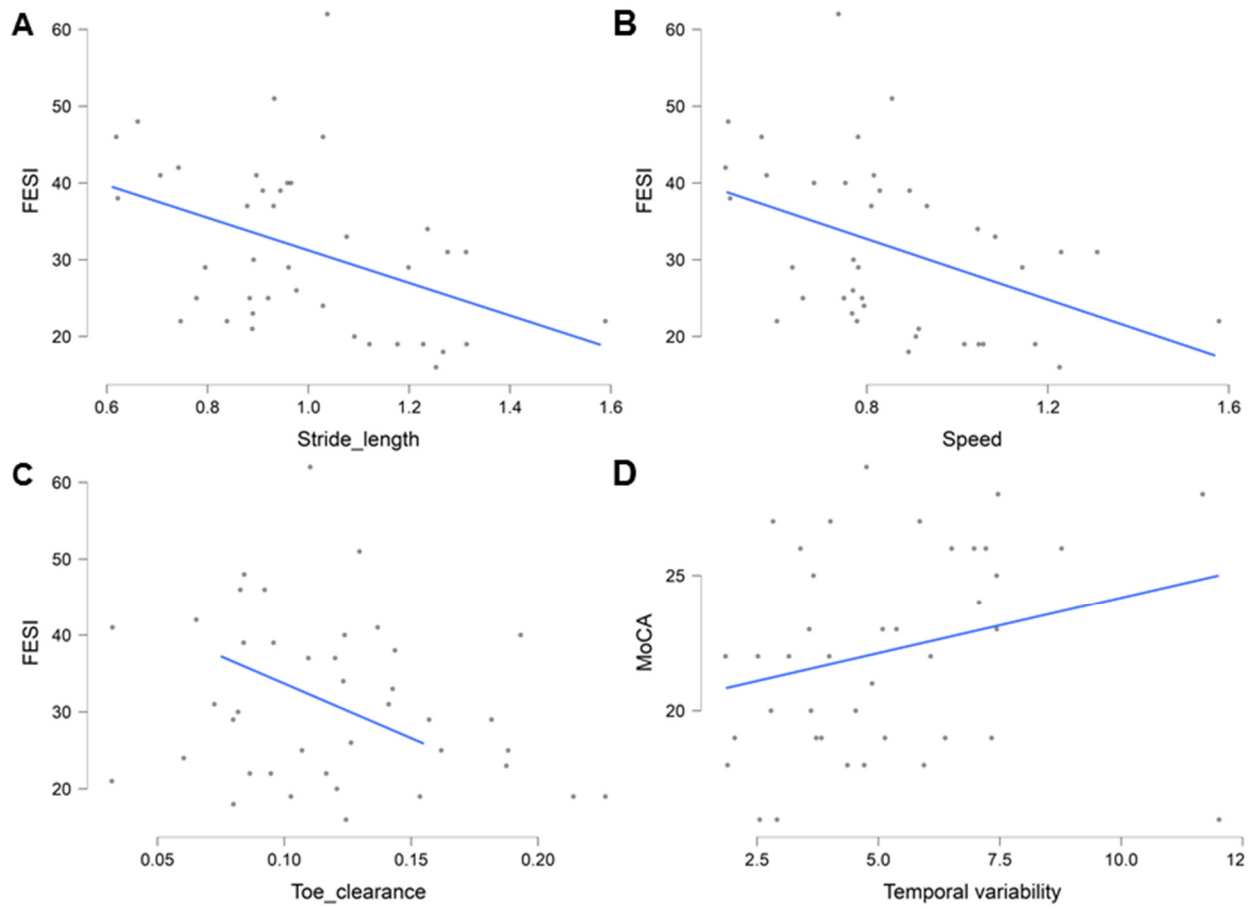

**Figure S2.** Univariate correlation plots. In the univariate analyses the Falls Efficacy Scale International (FES-I) correlated significantly with **A**) stride length ( $r = -0.42$ ,  $p = 0.006$ ), **B**) speed ( $r = -0.43$ ,  $p = 0.005$ ), and **C**) toe clearance ( $r = -0.35$ ,  $p = 0.029$ ). **D**) The Montreal cognitive assessment correlated significantly only with temporal variability ( $r = 0.32$ ,  $p = 0.047$ ).
